# Supplementary material for: Boosting the performance and stability of quasi-two-dimensional tin-based perovskite solar cells using the formamidinium thiocyanate additive
Source: Royal Society of Chemistry journal article supplement (doi:10.1039/c8ta05916k), 2018-01-01
Supplement: c8ta05916k1.pdf [file c8ta05916k1.pdf]

## Electronic Supplementary Information (ESI)

### **Boosting the Performance and Stability of Quasi-Two-Dimensional Tin-Based Perovskite Solar Cells Using a Formamidinium Thiocyanate Additive**

Hongki Kim,<sup>ab</sup> Yoon Ho Lee,<sup>ab</sup> Taecheon Lyu,<sup>c</sup> Jong Heun Yoo,<sup>ab</sup> Taiho Park<sup>b</sup> and Joon Hak Oh<sup>\*a</sup>

<sup>a</sup>School of Chemical and Biological Engineering, Institute of Chemical Processes, Seoul National University, 1, Gwanak-ro, Gwanak-gu, Seoul 08826, Republic of Korea.

E-mail: joonhoh@snu.ac.kr

<sup>b</sup>Department of Chemical Engineering, Pohang University of Science and Technology (POSTECH), Pohang, Gyeongbuk 37673, Republic of Korea.

<sup>c</sup>Department of Chemistry, Pohang University of Science and Technology (POSTECH), Pohang, Gyeongbuk 37673, Republic of Korea.

## Table of Contents

| Content                                                                                                                                           | Page |
|---------------------------------------------------------------------------------------------------------------------------------------------------|------|
| (Fig. S1–S2) XRD and GIWAXS analyses of quasi-2D tin-based perovskite films with different molar ratios of PEAI to FAI.                           | S3   |
| (Fig. S3) SEM images of quasi-2D tin-based perovskite films with different molar ratios of PEAI to FAI.                                           | S4   |
| (Fig. S4) $J$ – $V$ curves and of 3D FASnI <sub>3</sub> and quasi-2D tin-based perovskite solar cells with different molar ratios of PEAI to FAI. | S5   |
| (Fig. S5) Photographs of SnI <sub>2</sub> solutions in a DMF:DMSO (8:2 volume ratio) with different concentrations of FASCN additive .            | S6   |
| (Fig. S6) XRD diffractograms of SnI <sub>2</sub> films with or without the FASCN additive.                                                        | S7   |
| (Fig. S7) XPS spectrum of S (2p) in the 10% PEAI film with FASCN additive.                                                                        | S8   |
| (Fig. S8) XPS spectrum of S (2p) in the 10% PEAI film with FASCN additive.                                                                        | S9   |
| (Fig. S9) Statistics of photovoltaic parameters for the optimized 20 devices with different amounts of FASCN additive.                            | S10  |
| (Fig. S10) Steady-state photocurrents and PCEs of the best-performing devices without or with FASCN additive.                                     | S11  |
| (Fig. S11) $J$ – $V$ curves of the optimized devices in forward and reverse scans.                                                                | S12  |
| (Fig. S12) $J$ – $V$ curves the best-performing devices with different amounts of FASCN additive.                                                 | S13  |
| (Fig. S13) Photovoltaic parameters ( $J_{sc}$ , $V_{oc}$ , and FF) during stability tests.                                                        | S14  |
| (Fig. S14) Stability tests in ambient condition.                                                                                                  | S15  |
| (Fig. S15) Stability tests under continuous illumination.                                                                                         | S16  |
| (Fig. S16) $C$ – $V$ measurements of quasi-2D tin-based perovskite devices with different amounts of FASCN.                                       | S17  |
| (Fig. S17) Dark $I$ – $V$ curves of quasi-2D tin-based perovskite devices with or without the FASCN additive.                                     | S18  |
| (Fig. S18) Dark $I$ – $V$ plots of electron-only devices with different amounts of FASCN additive.                                                | S19  |
| (Fig. S19) EIS studies for quasi-2D tin-based perovskite with different amounts of FASCN additive.                                                | S20  |
| (Table S1) Photovoltaic parameters of quasi-2D tin-based perovskite solar cells with different molar ratios of PEAI to FAI.                       | S21  |
| (Table S2) Photovoltaic parameters of the best-performing devices with different amounts of FASCN additive.                                       |      |
| (Table S3) Summary for comparing the performances of previously reported FASnI <sub>3</sub> -based perovskite solar cells and our work.           |      |

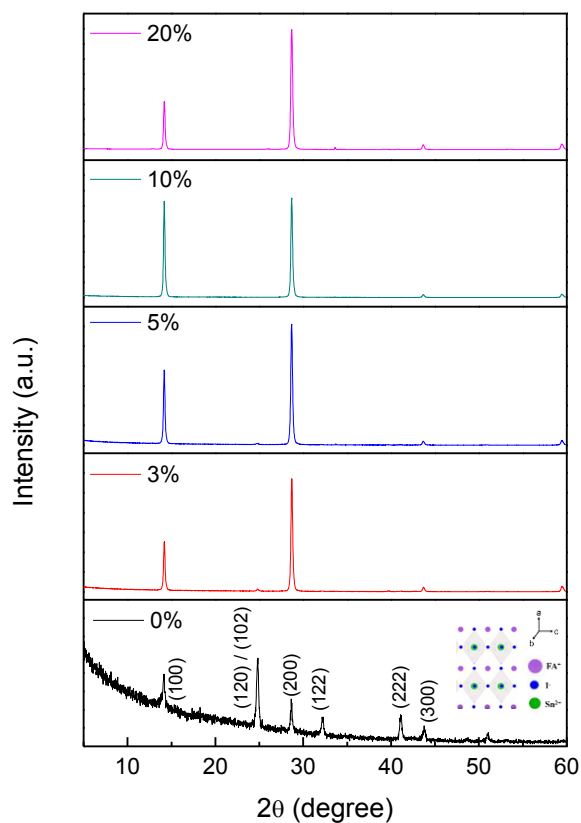

**Fig. S1** XRD diffractograms of quasi-2D tin-based perovskite films with different molar ratios of PEAI to FAI: 0% (FASnI<sub>3</sub>), 3%, 5%, 10%, and 20%.

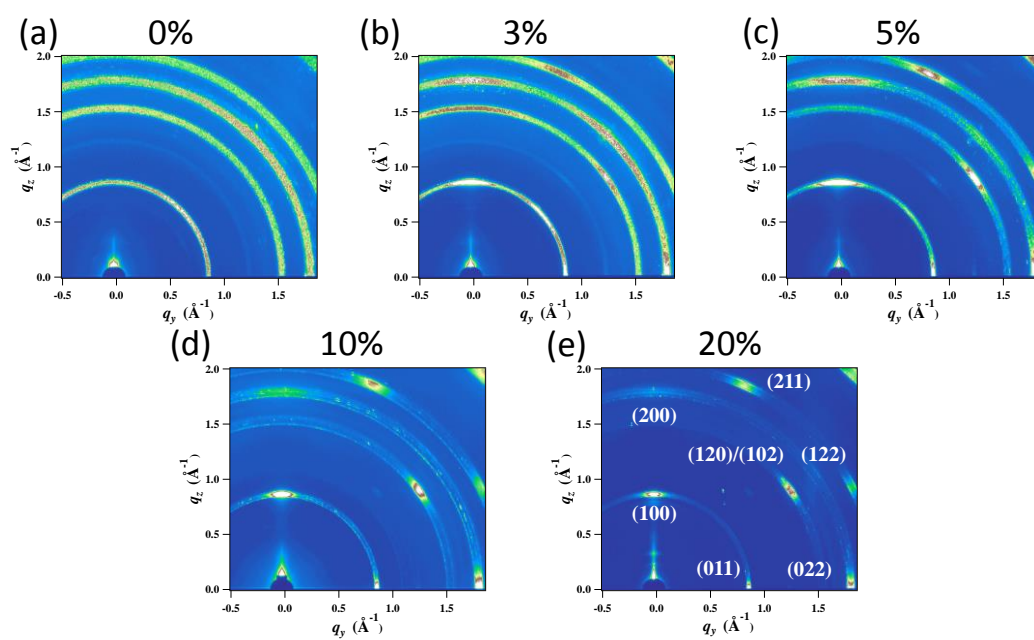

**Fig. S2** GIWAXS images of quasi-2D tin-based perovskite films with different molar ratios of PEAI to FAI: (a) 0% (FASnI<sub>3</sub>), (b) 3%, (c) 5%, (d) 10%, and (e) 20%.

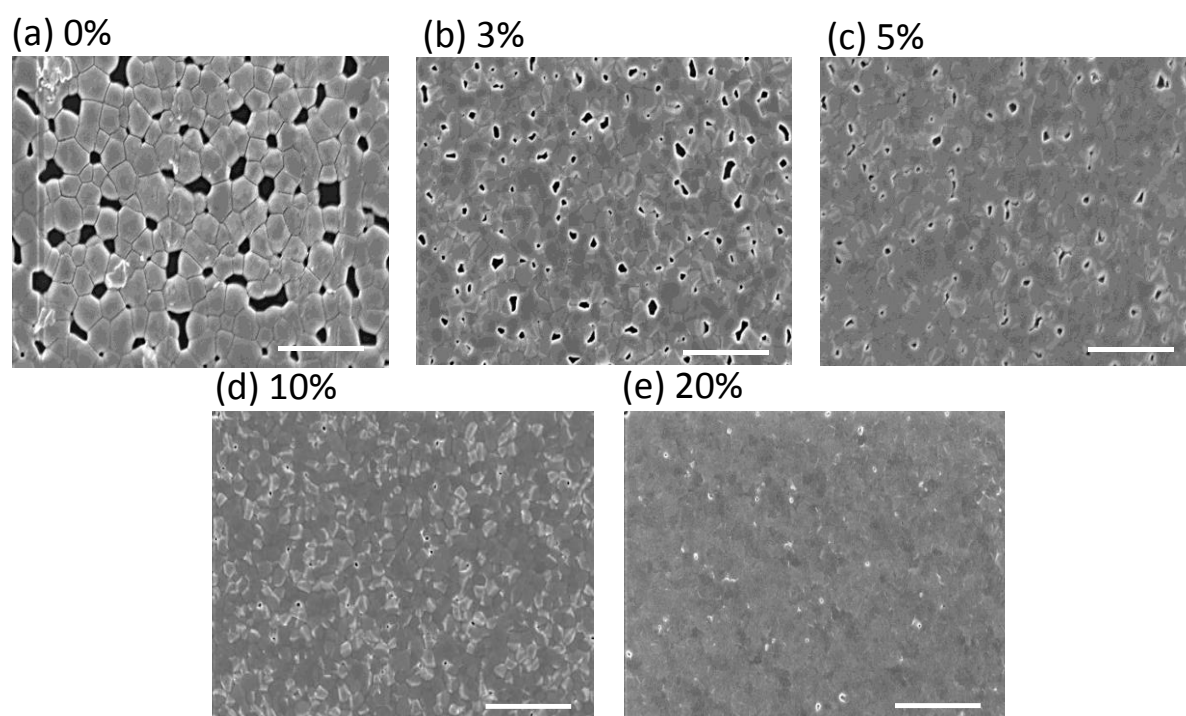

**Fig. S3** SEM images of quasi-2D tin-based perovskite films with different molar ratios of PEAI to FAI: 0% ( $\text{FASnI}_3$ ), 3%, 5%, 10%, and 20%. Scale bar in all images indicates 2.5  $\mu\text{m}$ .

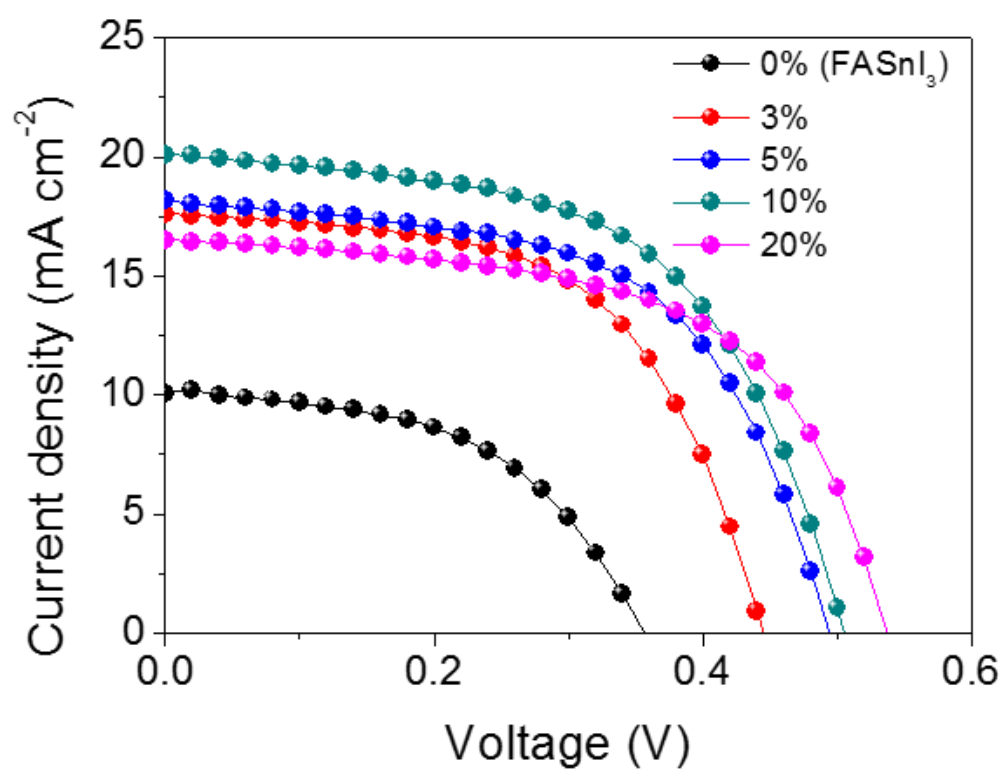

**Fig. S4** *J*-*V* curves of 3D FASnI<sub>3</sub> and quasi-2D tin-based perovskite solar cells with different molar ratios of PEAI to FAI under AM 1.5 G illumination.

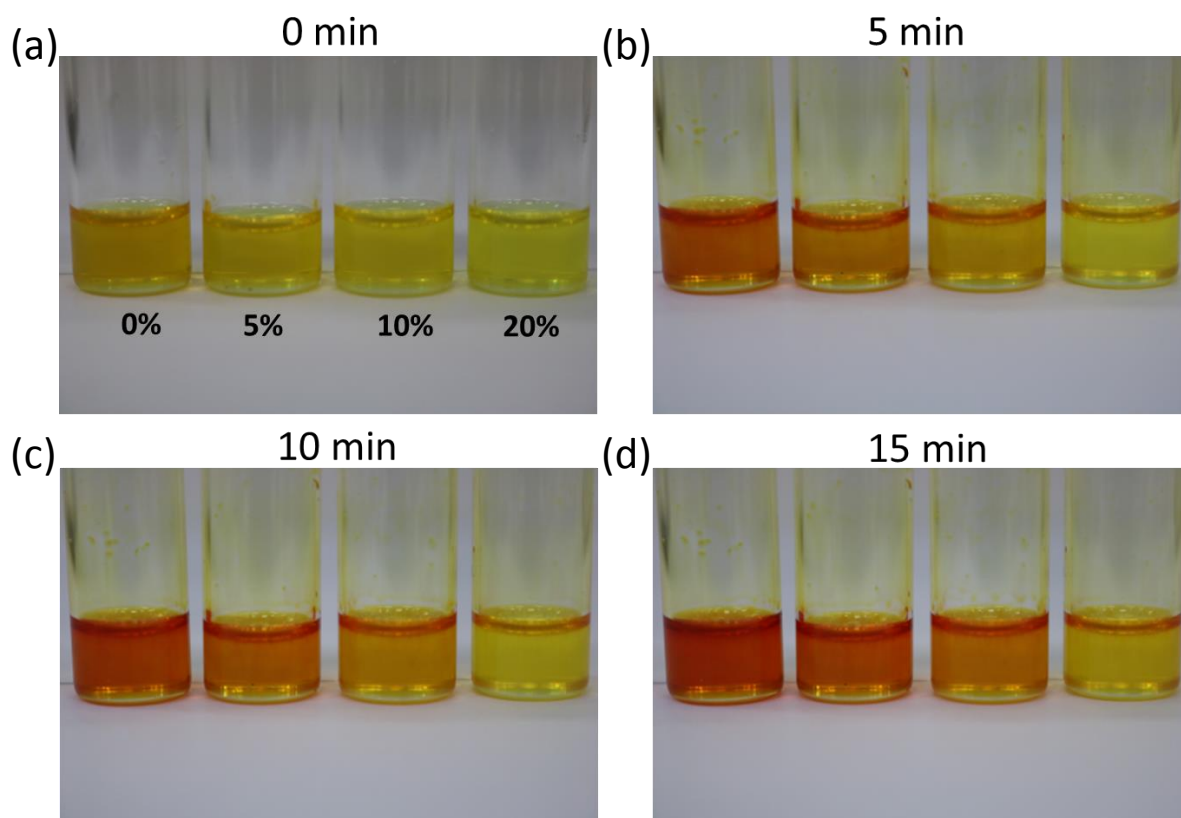

**Fig. S5** Photographs of  $\text{SnI}_2$  solutions in DMF:DMSO (8:2 volume ratio) with different concentrations of the FASCN additive (0, 5, 10, and 20 mol%) without  $\text{SnF}_2$  incorporation as functions of exposure time to air: (a) 0, (b) 5, (c) 10, and (d) 15 min.

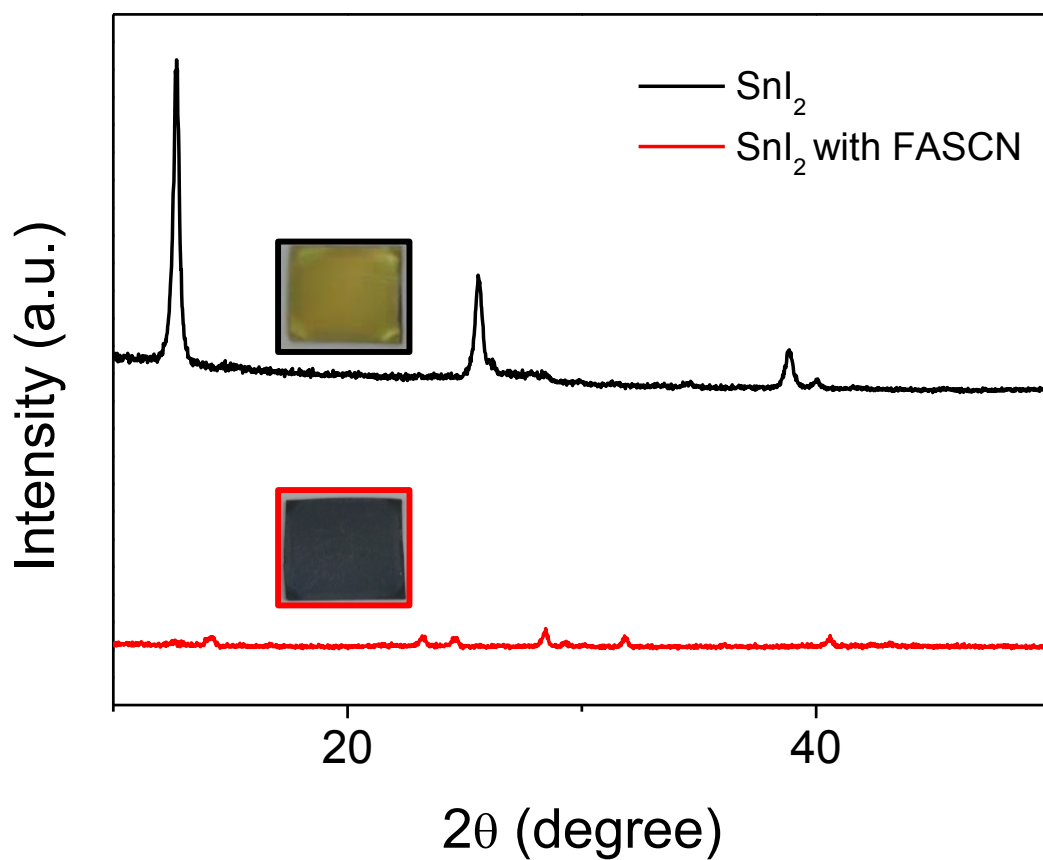

**Fig. S6** XRD diffractograms of SnI<sub>2</sub> films with or without FASCN additive. Inset photographs display SnI<sub>2</sub> films coated on Si wafers corresponding to the XRD results. SnI<sub>2</sub> films were fabricated in a nitrogen-filled glove box and exposed to ambient air for 30 minutes for XRD analysis.

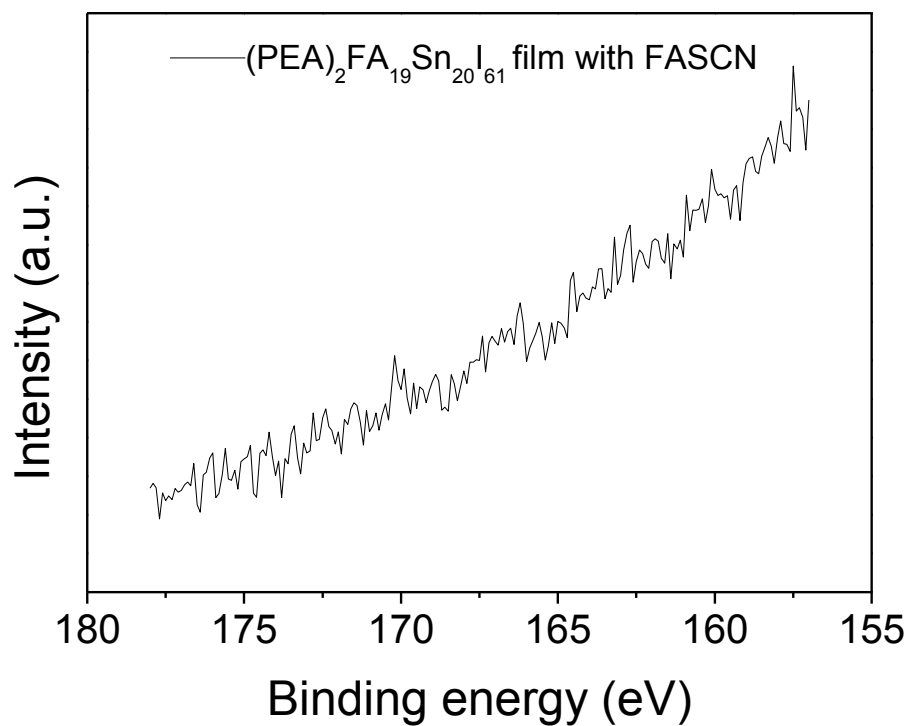

**Fig. S7** XPS spectrum showing the absence of S (2p) peak in the final 10% PEAI film with FASCN additive. The S (2p) peak is expected to appear at the binding energy near 165 eV.



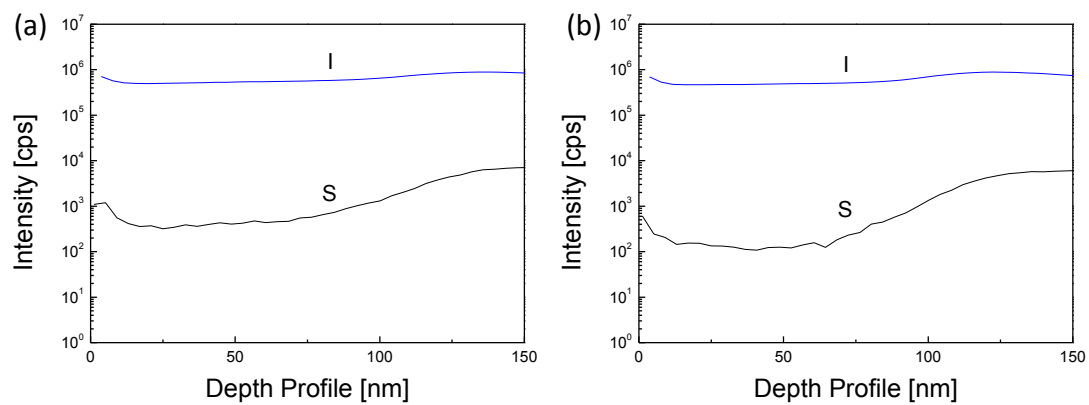

**Fig. S8** ToF-SIMS depth profiles for quasi-2D tin-based perovskite films with or without FASCN additive (5 mol%) (a) before annealing and (b) after annealing.

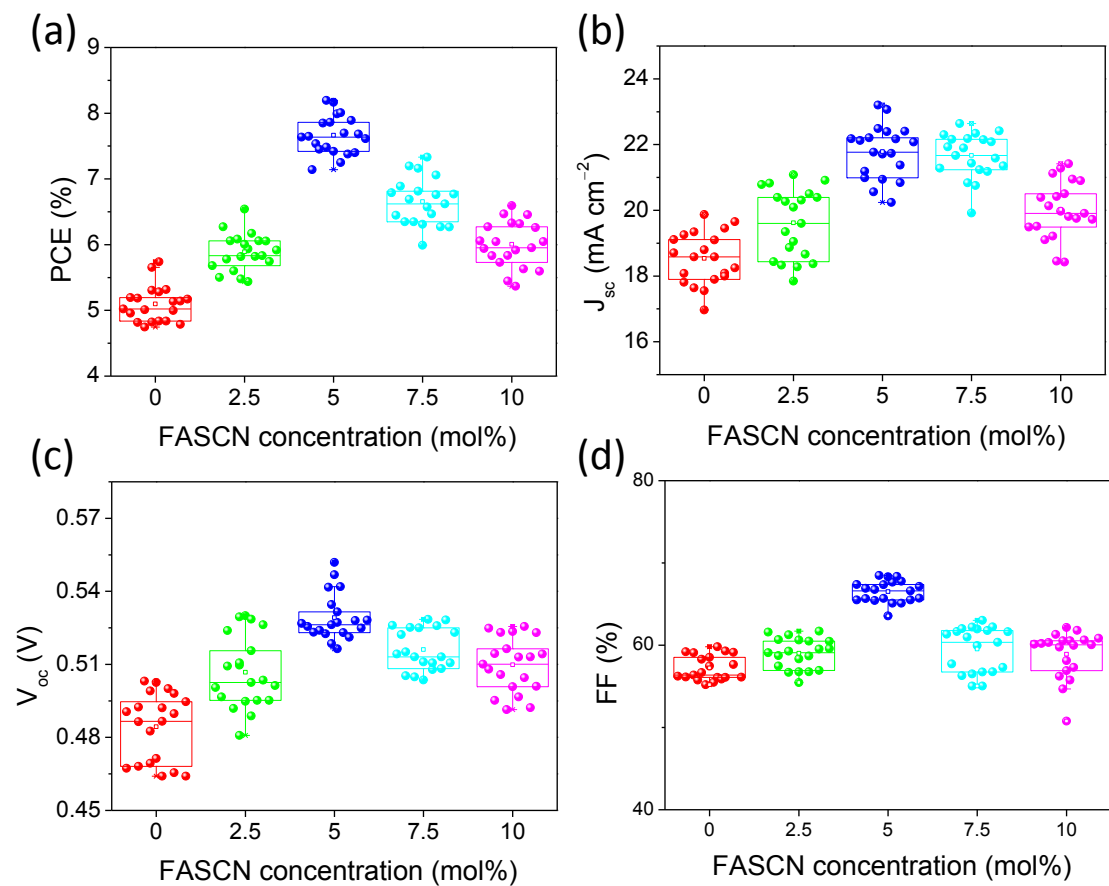

**Fig. S9** Statistics of photovoltaic parameters including (a) PCE, (b)  $J_{sc}$ , (c)  $V_{oc}$ , and (d) FF of the best-performing 20 devices with different amounts of FASCN additive.

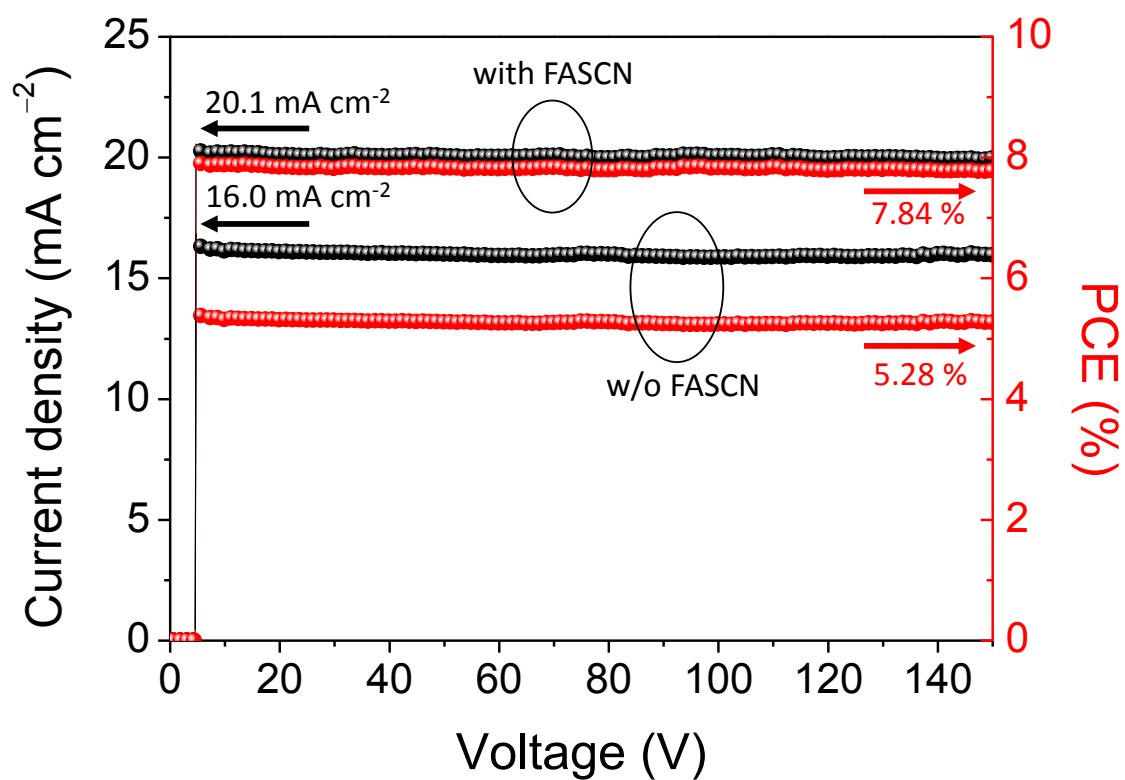

**Fig. S10** Steady-state photocurrents and PCEs of the best-performing devices without or with FASCN additive measured under a constant bias of 0.33 V (without FASCN) and 0.39 V (with FASCN) near their MPP.

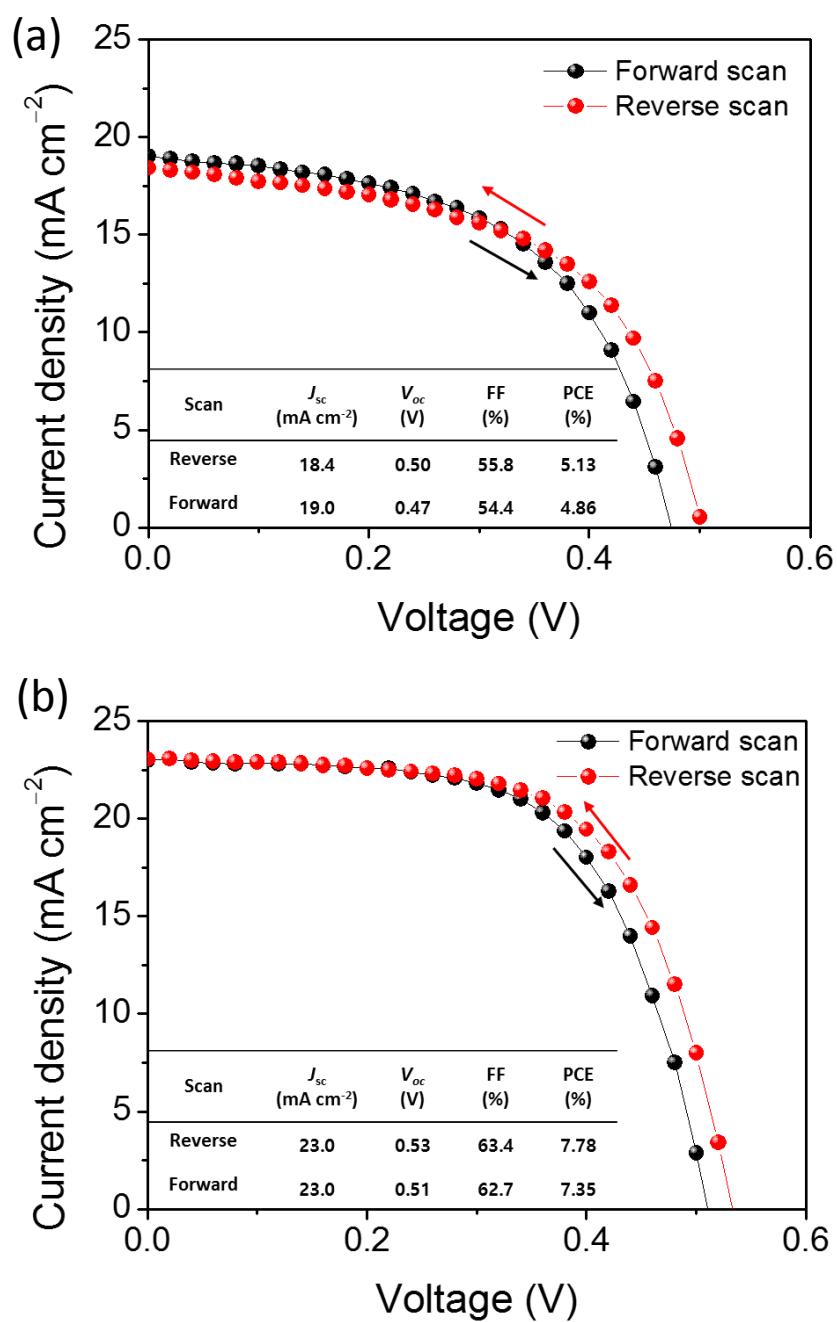

**Fig. S11**  $J$ - $V$  curves of the optimized devices (a) without or (b) with FASCN additive in forward and reverse scans.

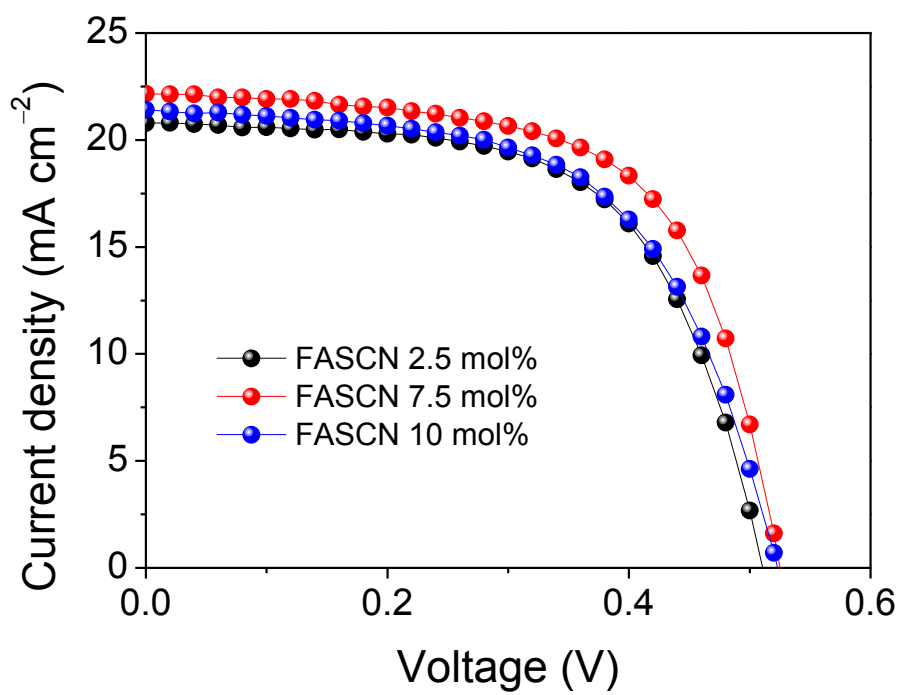

**Fig. S12** *J*–*V* curves of the best-performing devices with different amounts of FASCN additive.

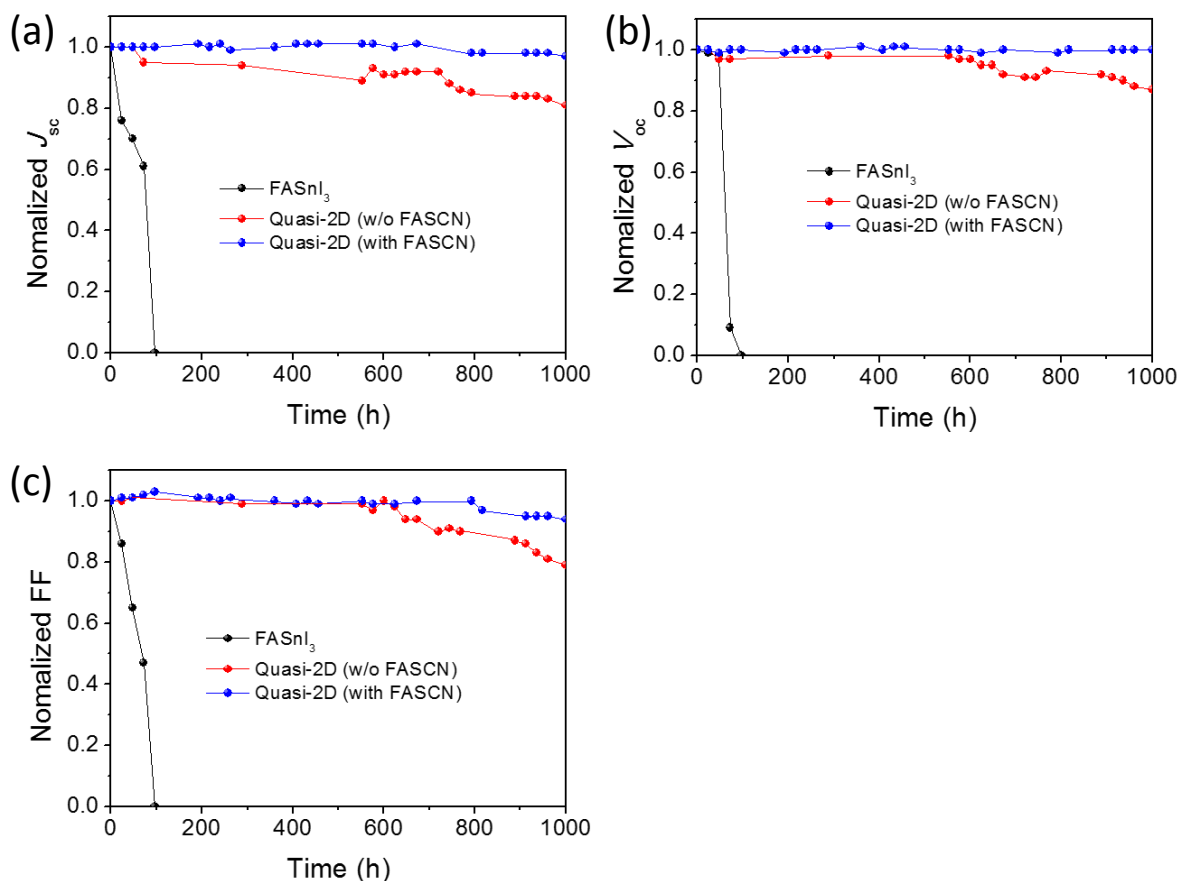

**Fig. S13** Variations in photovoltaic parameters including (a)  $J_{sc}$ , (b)  $V_{oc}$ , and (c) FF for stability tests over 1000 hours in a nitrogen-filled glove box for FASnI<sub>3</sub> and 10% PEAI devices with or without FASCN additive. Initial photovoltaic parameters: FASnI<sub>3</sub> ( $J_{sc}$ : 10.0 mA cm<sup>-2</sup>,  $V_{oc}$ : 0.35 V, FF: 52.0%, PCE: 1.81%); Quasi-2D (w/o FASCN) ( $J_{sc}$ : 18.8 mA cm<sup>-2</sup>,  $V_{oc}$ : 0.50 V, FF: 57.7%, PCE: 5.40%); Quasi-2D (with FASCN) ( $J_{sc}$ : 22.2 mA cm<sup>-2</sup>,  $V_{oc}$ : 0.53 V, FF: 67.4%, PCE: 7.86%)

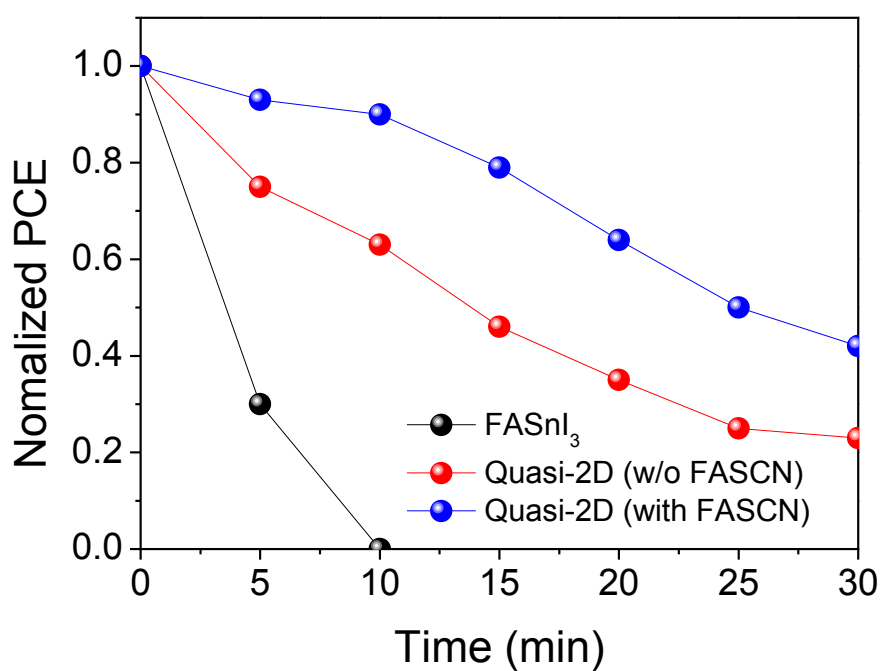

**Fig. S14** Stability tests for FASnI<sub>3</sub> and 10% PEAI devices with or without FASCN additive in ambient condition with a 40% relative humidity at room temperature. Initial photovoltaic parameters: FASnI<sub>3</sub> ( $J_{sc}$ : 9.7 mA cm<sup>-2</sup>,  $V_{oc}$ : 0.34 V, FF: 51.3%, PCE: 1.68%); Quasi-2D (w/o FASCN) ( $J_{sc}$ : 19.5 mA cm<sup>-2</sup>,  $V_{oc}$ : 0.50 V, FF: 56.7%, PCE: 5.53%); Quasi-2D (with FASCN) ( $J_{sc}$ : 21.7 mA cm<sup>-2</sup>,  $V_{oc}$ : 0.52 V, FF: 67.8%, PCE: 7.70%)

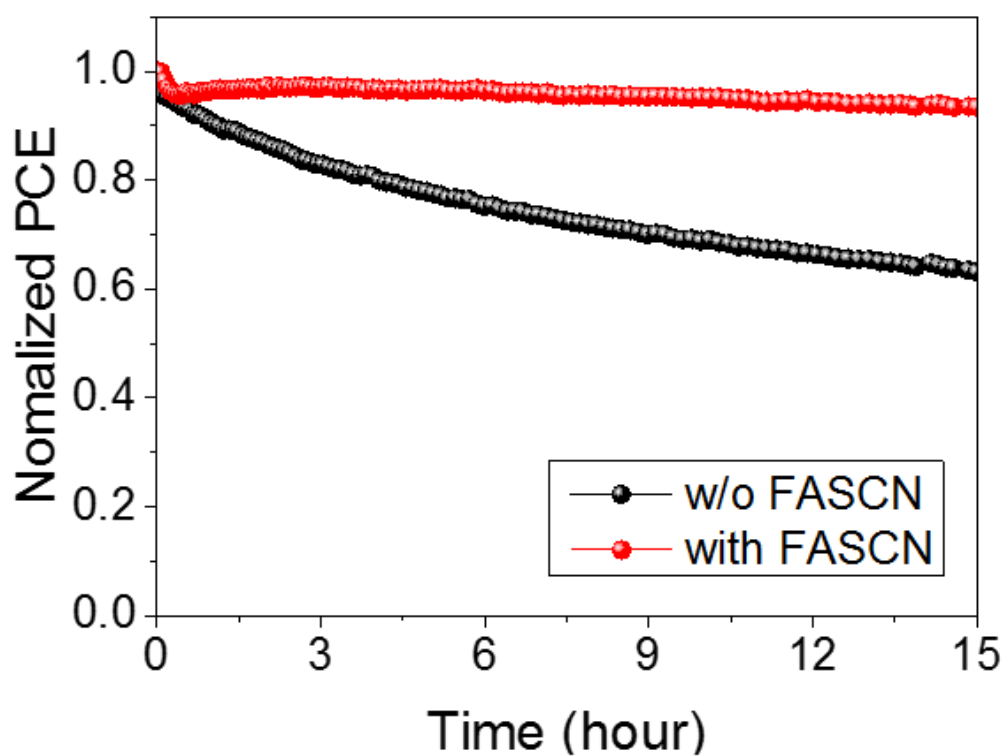

**Fig. S15** PCE tracking for 10% PEAI devices with or without FASCN additive under continuous 1 sun illumination at their MPP, which was measured in a nitrogen-filled glove box at 25 °C. (Initial photovoltaic parameters: Quasi-2D (w/o FASCN) ( $J_{sc}$ : 17.6 mA cm<sup>-2</sup>,  $V_{oc}$ : 0.49 V, FF: 57.9%, PCE: 5.01%,  $V_{mpp}$ : 0.36 V); Quasi-2D (with FASCN) ( $J_{sc}$ : 22.4 mA cm<sup>-2</sup>,  $V_{oc}$ : 0.53 V, FF: 67.7%, PCE: 7.99%,  $V_{mpp}$ : 0.40 V))



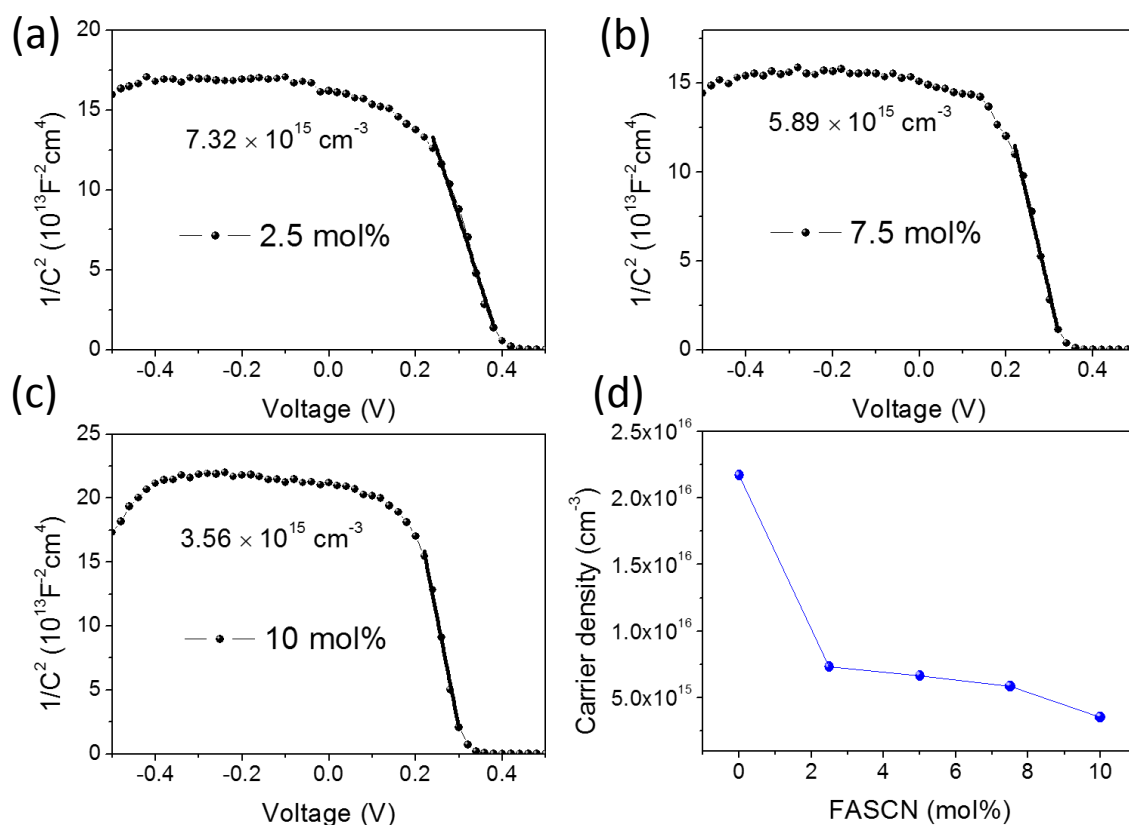

**Fig. S16** (a-c) C-V measurement results of the 10% PEAI devices with different amounts of FASCN where the calculated carrier density for each device is noted in the inset, (d) Carrier density profile as a function of FASCN concentration.

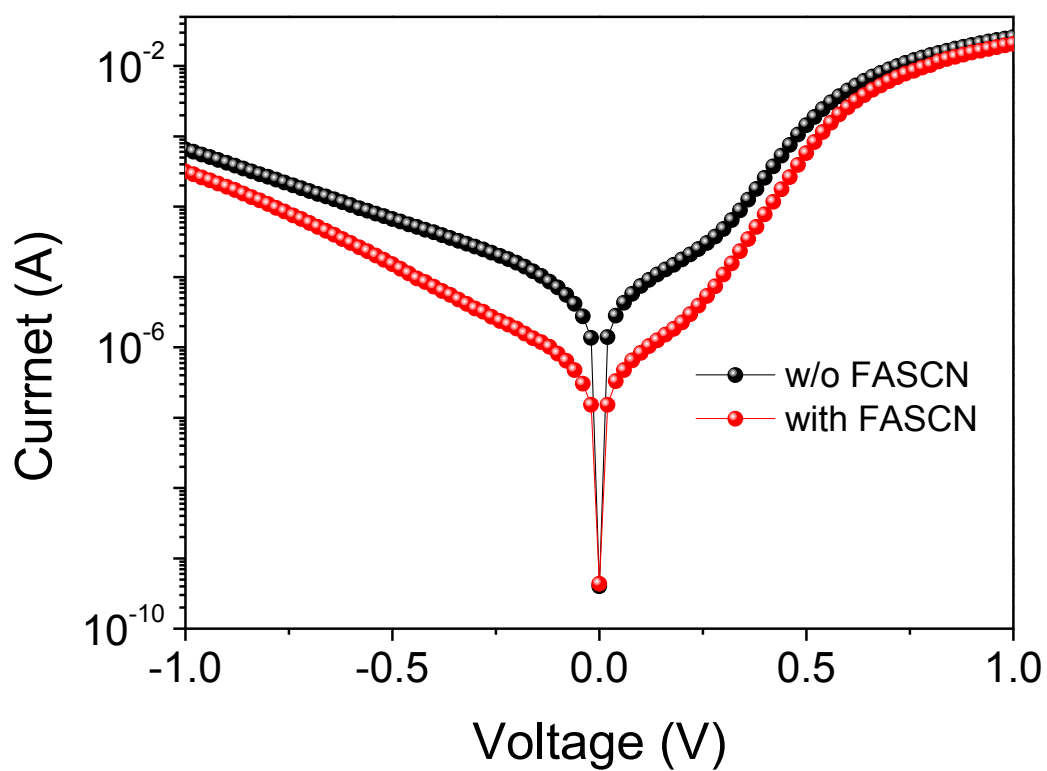

**Fig. S17** Dark  $I$ - $V$  curves of the 10% PEAI devices with or without FASCN additive.

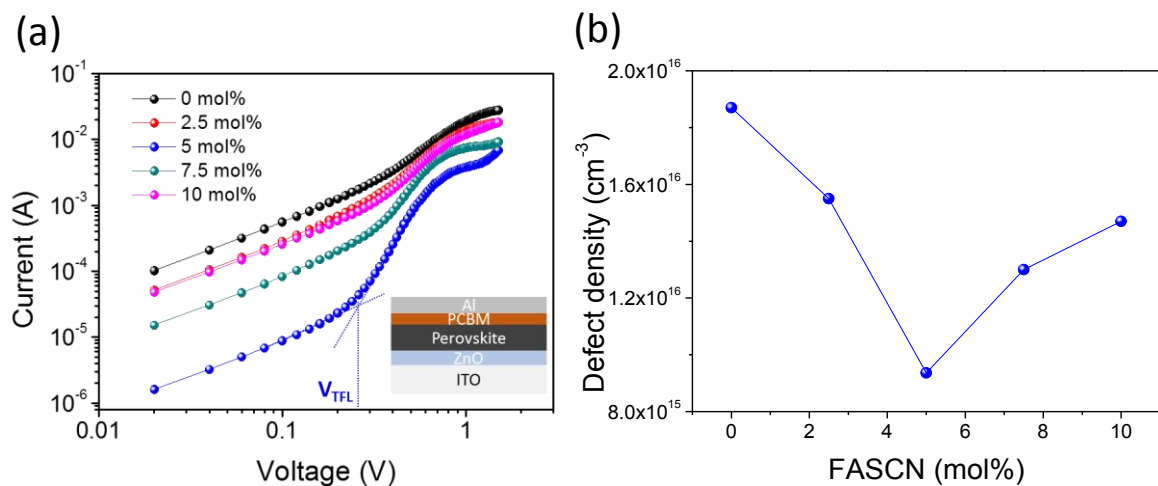

**Fig. S18** (a) Dark  $I$ - $V$  plots of electron-only devices with different amounts of FASCN additive where the configuration of electron-only device is shown in the inset, (b) Calculated trap densities as a function of amounts of FASCN additive.

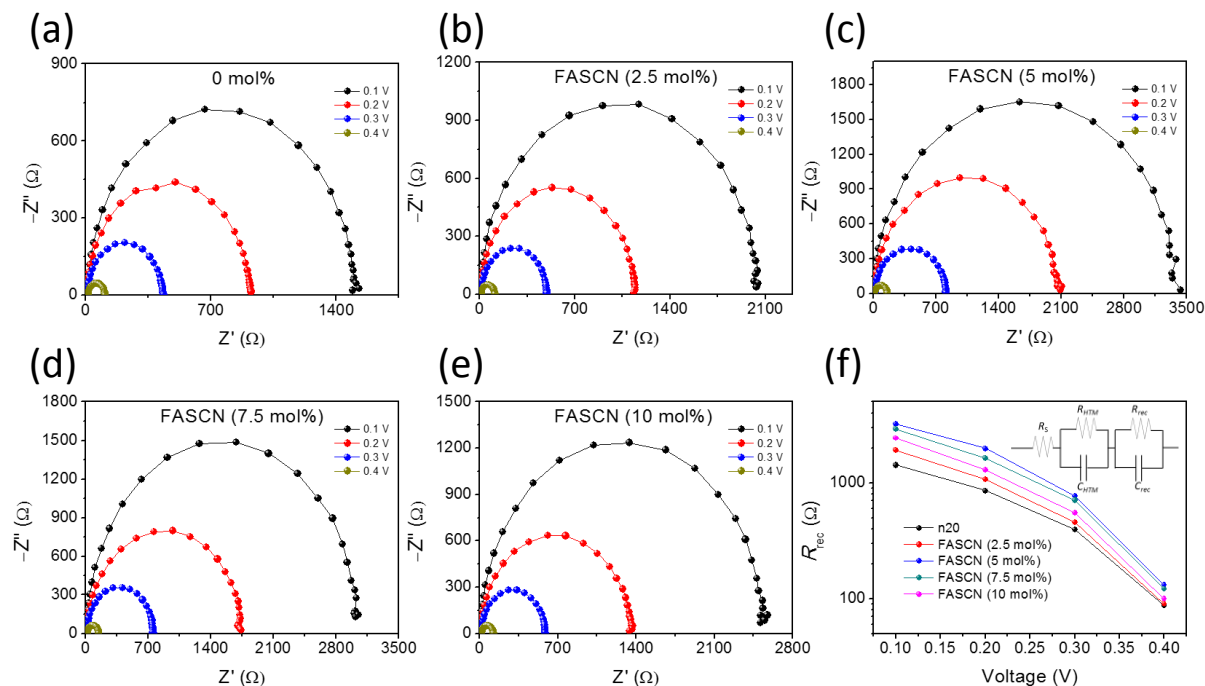

**Fig. S19** EIS studies under AM 1.5 G illumination at  $100 \text{ mW cm}^{-2}$  at different forward voltages. (a-e) The resulting Nyquist plots with different amounts of FASCN additive and (f) their corresponding  $R_{rec}$  as a function of applied forward voltage where the equivalent circuit used for fitting is shown in inset. ( $R_s$  is the series resistance,  $R_{HTM}$  is the hole transporting material (HTM) resistance,  $R_{rec}$  is the recombination resistance,  $C_{HTM}$  is the HMT capacitance, and  $C_{rec}$  is the recombination capacitance, respectively.)

**Table S1.** Photovoltaic parameters of 3D FASnI<sub>3</sub> and quasi-2D tin-based perovskite solar cells

| SnF <sub>2</sub><br>Concentration<br>[mol%] | Molar ratio of<br>PEAI to FAI<br>[%] | $J_{sc}$<br>[mA cm <sup>-2</sup> ] | $V_{oc}$<br>[V] | FF<br>[%] | PCE<br>[%] |
|---------------------------------------------|--------------------------------------|------------------------------------|-----------------|-----------|------------|
| 10                                          | 0                                    | 10.1                               | 0.36            | 51.2      | 1.84       |
|                                             | 3                                    | 17.6                               | 0.45            | 57.3      | 4.53       |
|                                             | 5                                    | 18.1                               | 0.49            | 57.4      | 5.15       |
|                                             | 10                                   | 19.9                               | 0.50            | 57.5      | 5.74       |
|                                             | 20                                   | 16.5                               | 0.53            | 58.0      | 5.07       |

**Table S2.** Photovoltaic parameters of the best-performing devices with different amounts of FASCN additive

| FASCN<br>Concentration<br>[mol%] | $J_{sc}$<br>[mA cm <sup>-2</sup> ] | $V_{oc}$<br>[V] | FF<br>[%] | PCE<br>[%] |
|----------------------------------|------------------------------------|-----------------|-----------|------------|
| 2.5                              | 20.8                               | 0.51            | 61.7      | 6.54       |
| 7.5                              | 22.2                               | 0.53            | 63        | 7.33       |
| 10                               | 21.4                               | 0.52            | 58.9      | 6.59       |

**Table S3.** Summary for comparing the performances of recently reported FASnI<sub>3</sub>-based perovskite solar cells and our work

| Absorber                                                              | Device<br>structure | Coating<br>method | $J_{sc}$<br>[mA cm <sup>-2</sup> ] | $V_{oc}$<br>[V] | FF<br>[%] | PCE<br>[%]                | Glove box<br>level [ppm]                        | Ref.        |
|-----------------------------------------------------------------------|---------------------|-------------------|------------------------------------|-----------------|-----------|---------------------------|-------------------------------------------------|-------------|
| FASnI <sub>3</sub> + pyrazine                                         | Conventional        | One-step          | 23.7                               | 0.32            | 63        | 4.8<br>(2.8) <sup>a</sup> | N/A                                             | (34)        |
| FA <sub>1-x</sub> MA <sub>x</sub> SnI <sub>3</sub>                    | Inverted            | One-step          | 21.2                               | 0.61            | 62.7      | 8.12<br>(6.6)             | O <sub>2</sub> < 1.0<br>H <sub>2</sub> O < 0.02 | (22)        |
| (PEA) <sub>2</sub> FA <sub>n-1</sub> SnI <sub>3n+1</sub><br>(20% PEA) | Inverted            | One-step          | 14.44                              | 0.59            | 69        | 5.94<br>(1.21)            | O <sub>2</sub> < 3<br>H <sub>2</sub> O < 1      | (30)        |
| (PEA) <sub>2</sub> FA <sub>n-1</sub> SnI <sub>3n+1</sub><br>(8% PEA)  | Inverted            | One-step          | 24.1                               | 0.525           | 71        | 9<br>(6)                  | N/A                                             | (31)        |
| {en}FASnI <sub>3</sub>                                                | Conventional        | One-step          | 22.54                              | 0.48            | 65.96     | 7.14<br>(2.34)            | N/A                                             | (27)        |
| FASnI <sub>1-x</sub> Br <sub>x</sub>                                  | Conventional        | One-step          | 19.8                               | 0.414           | 66.9      | 5.5<br>(3.46)             | N/A                                             | (23)        |
| FASnI <sub>3</sub> + SnF <sub>2</sub> + TMA                           | Inverted            | Two-step          | 22.45                              | 0.47            | 67.8      | 7.09<br>(4.2)             | N/A                                             | (24)        |
| FASnI <sub>3</sub> + SnF <sub>2</sub> + TMA                           | Conventional        | Two-step          | 21.65                              | 0.31            | 64.7      | 4.34<br>(2.26)            | N/A                                             | (24)        |
| (PEA) <sub>2</sub> FA <sub>n-1</sub> SnI <sub>3n+1</sub><br>(10% PEA) | Inverted            | One-step          | 22.5                               | 0.53            | 68.3      | 8.17<br>(1.84)            | O <sub>2</sub> < 5<br>H <sub>2</sub> O < 2.2    | Our<br>work |

<sup>a</sup>The efficiency of the reference FASnI<sub>3</sub> device presented in the corresponding paper.
